# Supplementary material for: A green route for synthesizing pure silica zeolites with six-membered rings
Source: Royal Society of Chemistry journal article supplement (doi:10.1039/d2dt01027e), 2022-01-01
Supplement: d2dt01027e1.pdf [file d2dt01027e1.pdf]

## Electronic Supplementary Information

### Green Route for Synthesizing Pure Silica Zeolites with Six-Membered Rings

Yuhan Yang,<sup>a</sup> Shujie Dai,<sup>b</sup> Xiyuan Yu,<sup>a</sup> Baogang Liu,<sup>c</sup> Longfeng Zhu,<sup>\*a</sup> Hongxia Shen,<sup>a</sup> and Xuebo Cao<sup>\*a</sup>

<sup>a</sup> College of Biological, Chemical Science and Engineering, Jiaxing University, Jiaxing 314001, China.

<sup>b</sup> Key Laboratory of Advanced Textile Materials and Manufacturing Technology, Ministry of Education, Zhejiang Sci-Tech University, Hangzhou 310018, China.

<sup>c</sup> Huaian Liuyuanhuan New Material Co., LTD, Huaian 211751, China.

\* Corresponding author. E-mail: zhulf1988@mail.zjxu.edu.cn; xbcao@zjxu.edu.cn

## Experimental Section

### Materials

Sodium metasilicate nonahydrate ( $\text{Na}_2\text{SiO}_3 \cdot 9\text{H}_2\text{O}$ , 98%, Sinopharm Chemical Reagent Co., Ltd.), ethanol (99.8%, Sinopharm Chemical Reagent Co., Ltd.), solid silica gel (98%, Qingdao Haiyang Chemical Reagent Co., Ltd.), were used without further purification. The deionized water was made in our laboratory.

### Syntheses of samples

Synthesis of pure silica zeolite with SOD structure

In a typical run for the synthesis of pure silica zeolite with SOD structure, 0.3 g of  $\text{Na}_2\text{SiO}_3 \cdot 9\text{H}_2\text{O}$ , 1.56 g of solid silica gel, and 0.1 g of SOD seeds were mixed, followed by addition of 1.9 g of ethanol. After heating at 140 °C for 4 days in an autoclave, the product was finally crystallized, which was designated as S-SOD. Notably, the obtained S-SOD product could also be used as seed crystals for synthesizing pure silica S-SOD-2nd zeolite.

#### Synthesis of pure silica zeolite with MTN structure

In a typical run for the synthesis of pure silica zeolite with MTN structure, 0.3 g of  $\text{Na}_2\text{SiO}_3 \cdot 9\text{H}_2\text{O}$ , 1.56 g of solid silica gel, and 0.1 g of MTN seeds were mixed, followed by addition of 1.9 g of ethanol. After heating at 180 °C for 2 days in an autoclave, the product was fully crystallized, which was designated as S-MTN.

#### Synthesis of pure silica zeolite with NON structure

In a typical run for the synthesis of pure silica zeolite with NON structure, 0.65 g of  $\text{Na}_2\text{SiO}_3 \cdot 9\text{H}_2\text{O}$ , 1.54 g of solid silica gel, and 0.1 g of NON seeds were mixed, followed by addition of 1.9 g of ethanol. After heating at 180 °C for 1 day in an autoclave, the product was fully crystallized, which was designated as S-NON.

### **Characterization**

X-ray powder diffraction (XRD) patterns were measured with a Rigaku Ultimate VI X-ray diffractometer (40 kV, 40 mA) using  $\text{CuK}\alpha$  ( $\lambda=1.5406 \text{ \AA}$ ) radiation. TG-DTA analysis was carried out with a NETZSCH STA 449C in air at a heating rate of 10 °C/min from room temperature to 800 °C. The Fourier Transform-Infrared Spectroscopy (FT-IR) spectra were recorded using a Bruker 66V FT-IR spectrometer. Scanning electron microscopy (SEM) experiments were performed on Hitachi SU-1510 electron microscopes.  $^{29}\text{Si}$ ,  $^{13}\text{C}$ , and  $^1\text{H}$  MAS NMR spectra were recorded on a Bruker AVANCEIII 500WB spectrometer.

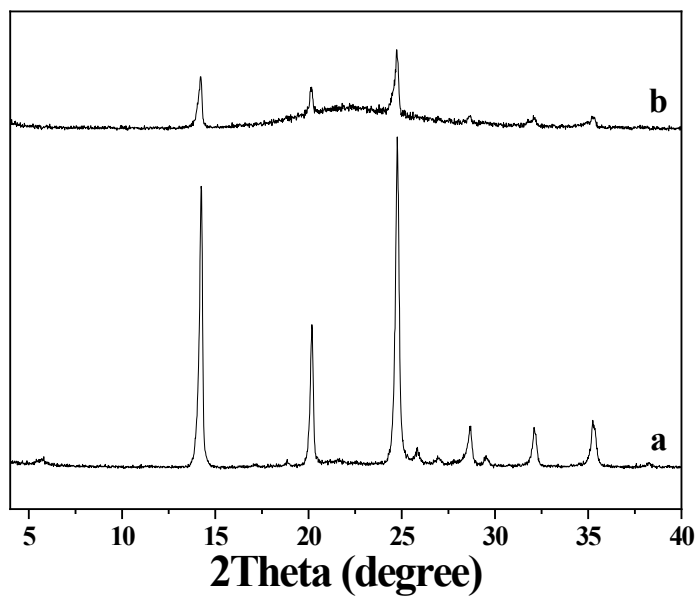

**Figure S1** XRD patterns of the products synthesized from the starting mixture with molar ratio of 1.0  $\text{SiO}_2$ /0.04  $\text{Na}_2\text{O}$ /6% seeds with  $\text{C}_2\text{H}_5\text{OH}/\text{SiO}_2$  ratios of (a) 0.5, and (b) 3, respectively.

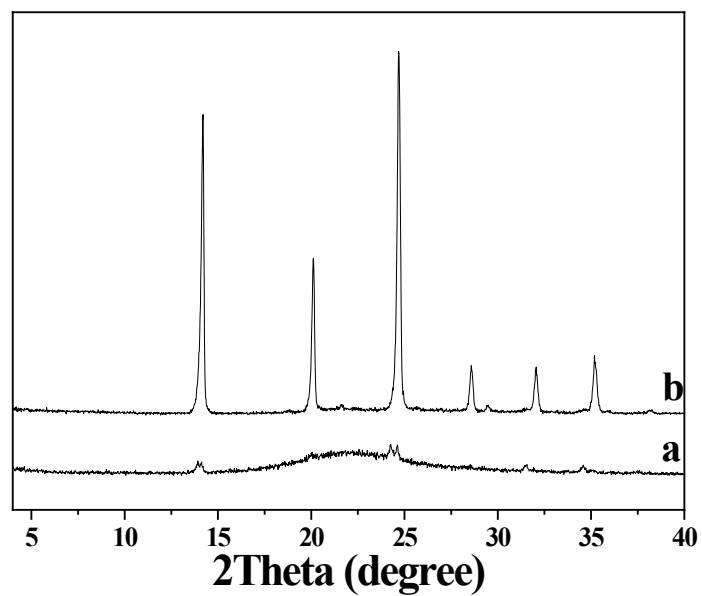

**Figure S2** XRD patterns of the products synthesized from the starting mixture with molar ratio of 1.0  $\text{SiO}_2$ /1.5  $\text{C}_2\text{H}_5\text{OH}$ /6% seeds with  $\text{Na}_2\text{O}/\text{SiO}_2$  ratios of (a) 0.03, and (b) 0.05, respectively.

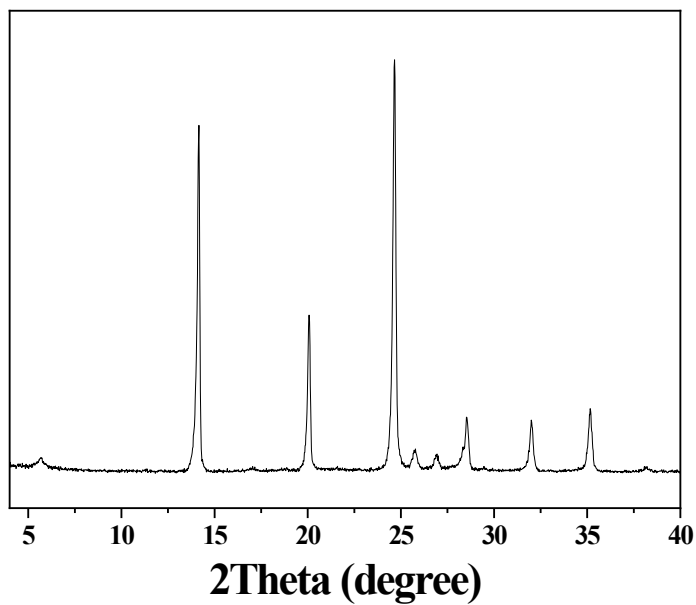

**Figure S3** XRD pattern of the product synthesized from the starting mixture with molar ratio of 1.0 SiO<sub>2</sub>/0.04 Na<sub>2</sub>O/1.5 C<sub>2</sub>H<sub>5</sub>OH/3 H<sub>2</sub>O/6% seeds.

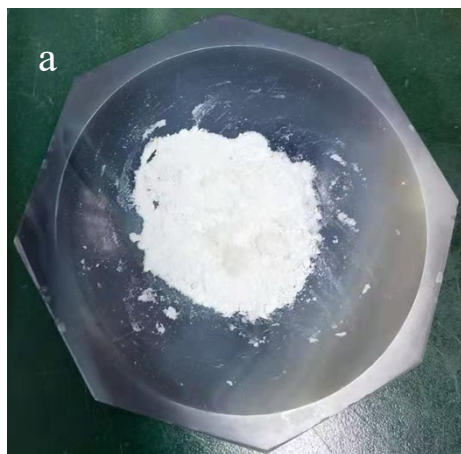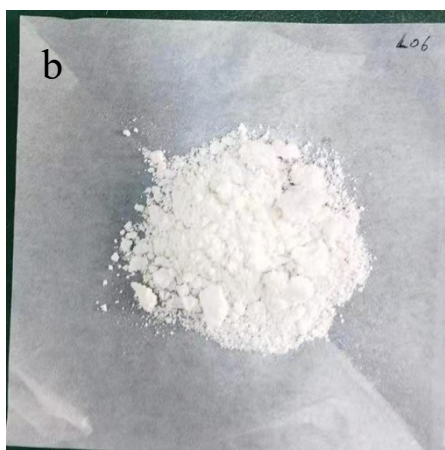

**Figure S4** Photographs of (a) the initial mixtures before crystallization and (b) the product after crystallization, respectively.

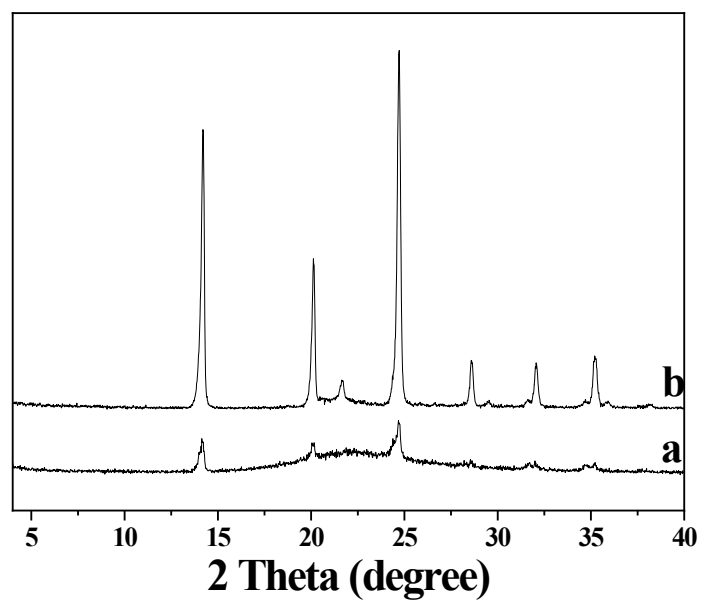

**Figure S5** XRD patterns of the products synthesized from the starting mixture with molar ratio of 1.0  $\text{SiO}_2$ /0.04  $\text{Na}_2\text{O}$ /1.5  $\text{C}_2\text{H}_5\text{OH}$ /6% seeds at (a) 120 °C, and (b) 160 °C, respectively.

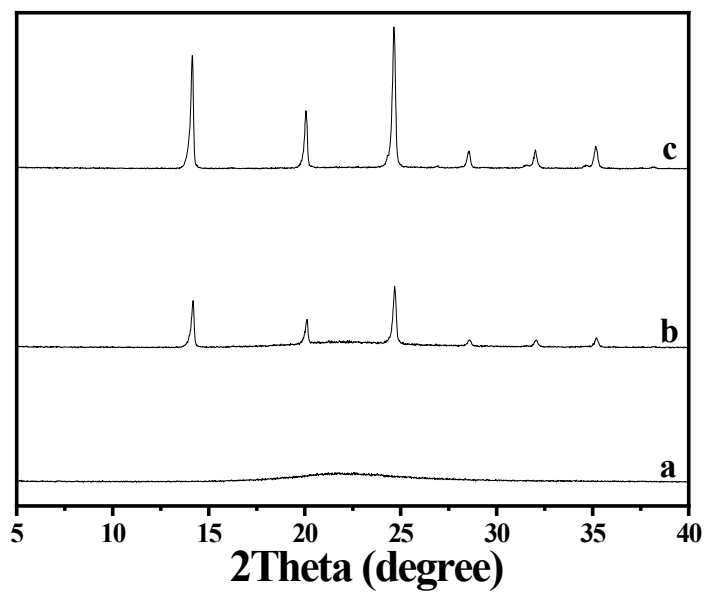

**Figure S6** XRD patterns of the products synthesized from the starting mixture with molar ratio of 1.0  $\text{SiO}_2$ /0.04  $\text{Na}_2\text{O}$ /1.5  $\text{C}_2\text{H}_5\text{OH}$  with mass ratios of zeolite seeds to the silica source at (a) 0%, (b) 2.5%, and (c) 10%, respectively.



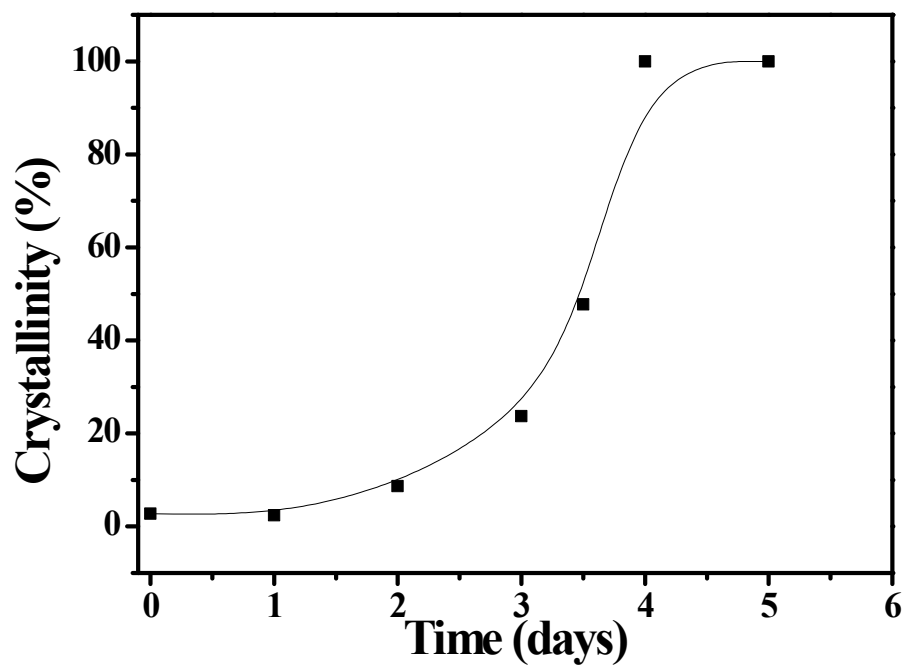

**Figure S7** The dependence of pure silica SOD zeolite crystallinity over crystallization time. The S-SOD crystallinity is based on its peak intensity at  $24.8^\circ$  in XRD pattern, and fully crystallized S-SOD crystallized at  $140^\circ\text{C}$  for 4 d is designated as 100 % crystallinity.

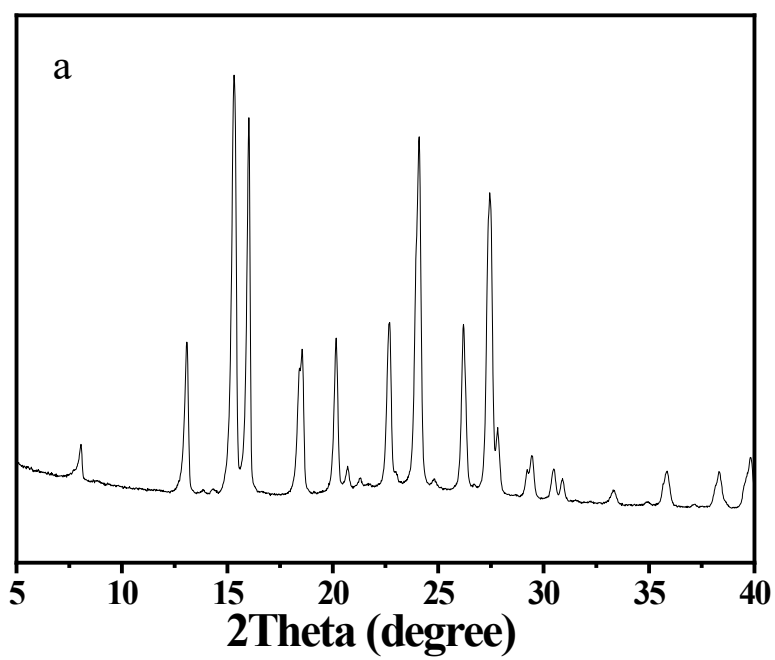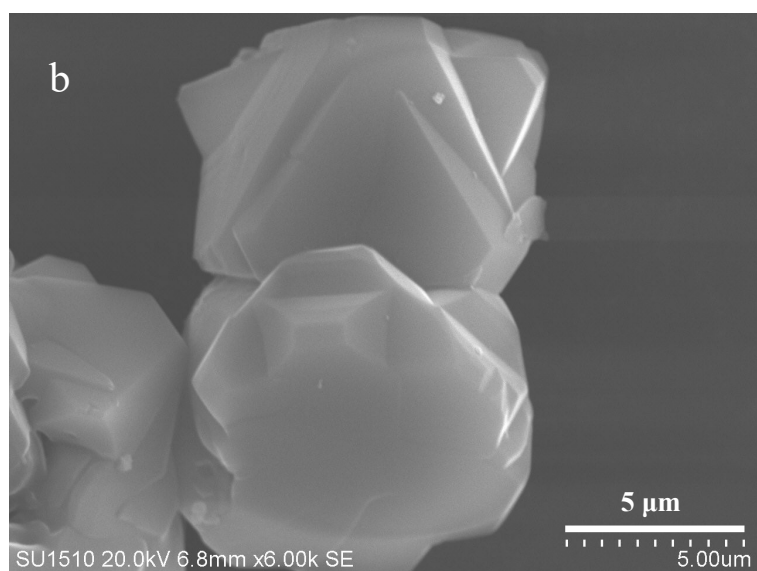

**Figure S8** (a) XRD pattern and (b) SEM image of pure silica MTN zeolite.

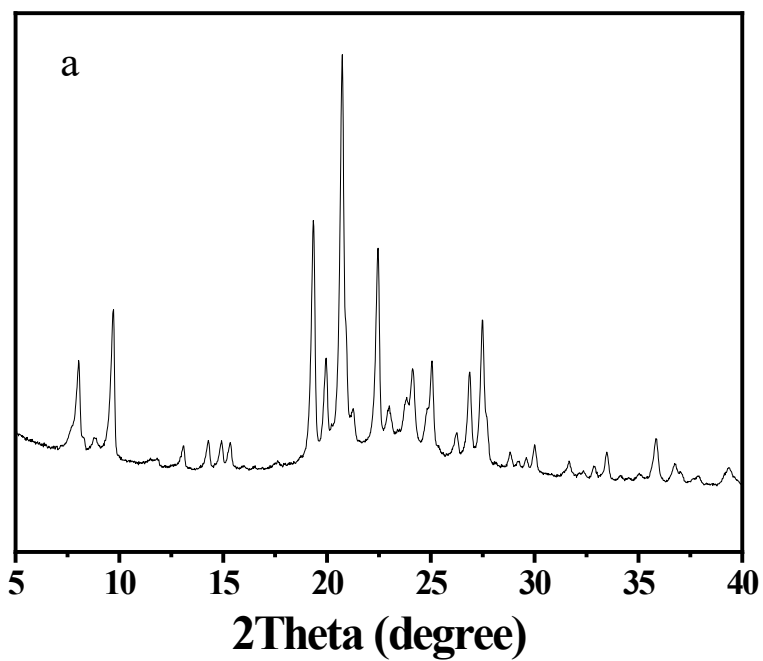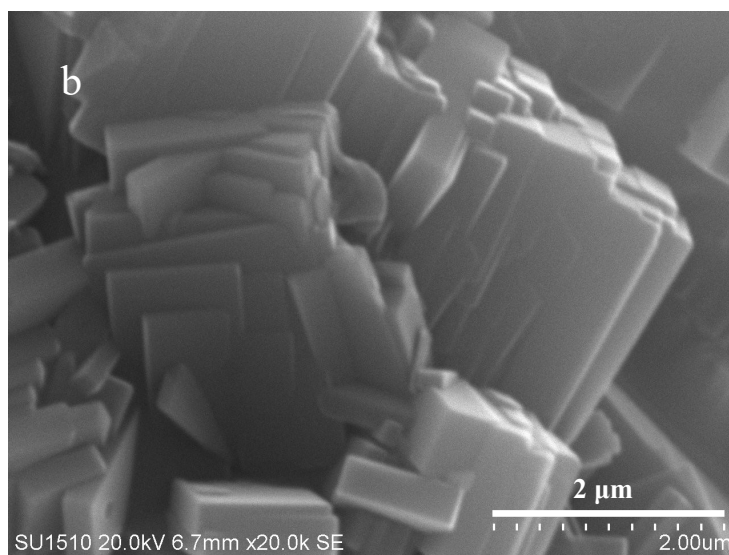

**Figure S9** (a) XRD pattern and (b) SEM image of pure silica NON zeolite.

**Table S1.** <sup>29</sup>Si NMR data of S-SOD samples synthesized for 0-4 days

| Time<br>(days) | Si(4Si)<br>(ppm) | Si(4Si)<br>(ppm) | Si(3Si)<br>(ppm) |
|----------------|------------------|------------------|------------------|
| 0              |                  | -111.0           | -100.6           |
| 1              |                  | -111.2           | -100.3           |
| 2              | -116.3           | -111.5           | -102.6           |
| 3.5            | -116.7           | -111.6           | -100.3           |
| 4              | -116.5           | -111.1           | -100.5           |

**Table S2.** Structural information on S-SOD samples from  $^{29}\text{Si}$  NMR analysis

| Time<br>(days) | Si(4Si)<br>(%) | Si(4Si)<br>(%) | Si(3Si)<br>(%) |
|----------------|----------------|----------------|----------------|
| 0              |                | 81.2           | 18.8           |
| 1              |                | 84.3           | 15.7           |
| 2              | 2.0            | 68.1           | 29.9           |
| 3.5            | 9.9            | 74.7           | 15.4           |
| 4              | 64.7           | 26.1           | 9.2            |
